# Supplementary material for: Dairy production in an urbanizing environment—Typology and linkages in the megacity of Bengaluru, India
Source: PubMed Central journal article supplement (PMC8360525; doi:10.1371/journal.pone.0255791), 2021-08-12
Supplement: pone.0255791.s001.pdf [file pone.0255791.s001.pdf]

**S1 Table.** Number of selected settlements and completed dairy production baseline surveys in the northern research transect (Nsect), in the southern research transect (Ssect) and in additional locations (Add.) per survey stratification index (SSI) stratum and urbanization level.

| Urbanization level | SSI       | Settlements (n) |       |      |       | Surveys (n)        |                    |                |       | Percentage |
|--------------------|-----------|-----------------|-------|------|-------|--------------------|--------------------|----------------|-------|------------|
|                    |           | Nsect           | Ssect | Add. | Total | Nsect <sup>†</sup> | Ssect <sup>‡</sup> | Add.           | Total |            |
| Urban              | Stratum 1 | 1               | 2     | 1    | 4     | 3                  | 8                  | 4 <sup>†</sup> | 15    | 9%         |
|                    | Stratum 2 | 1               | 2     | 1    | 4     | 8                  | 5                  | 2 <sup>†</sup> | 15    |            |
| Peri-Urban         | Stratum 3 | 1               | 2     |      | 3     | 13                 | 13                 |                | 26    | 33%        |
|                    | Stratum 4 | 3               | 4     |      | 7     | 38                 | 46                 |                | 84    |            |
| Rural              | Stratum 5 | 5               | 4     |      | 9     | 43                 | 87                 |                | 130   | 58%        |
|                    | Stratum 6 | 1               | 1     |      | 5     | 45                 | 22                 |                | 67    |            |
| Overall            |           | 15              | 15    | 2    | 32    | 150                | 181                | 6              | 337   |            |

<sup>†</sup>selection threshold per settlement of 20%

<sup>‡</sup>selection threshold per settlement of 30%
